# Supplementary material for: Inhibitory Effect on Nitric Oxide Release in LPS-Stimulated Macrophages and Free Radical Scavenging Activity of Croton linearis Jacq. Leaves
Source: MDPI journal article supplement (doi:10.3390/antiox11101915), 2022-09-27
Supplement: s1 [file s1]

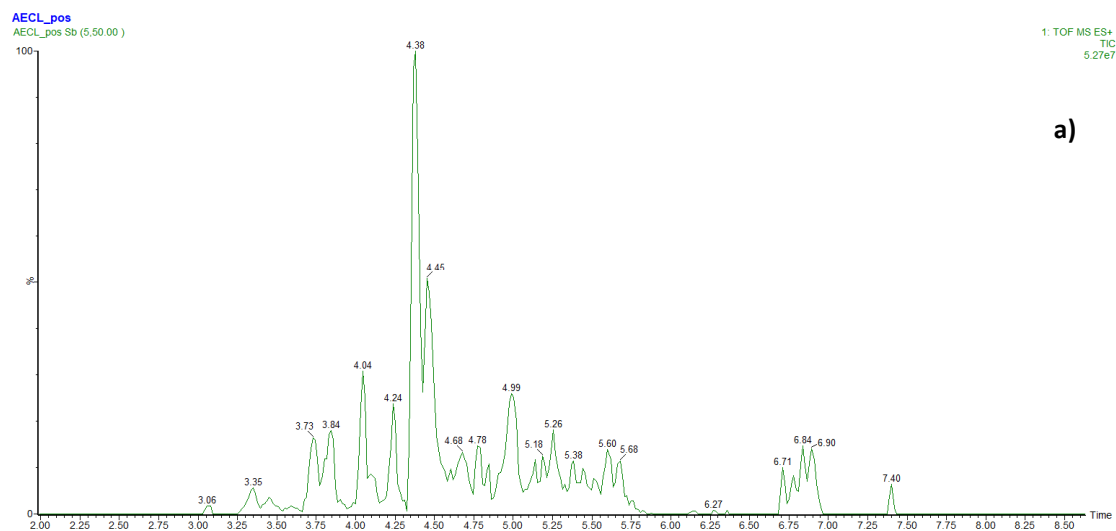

a)

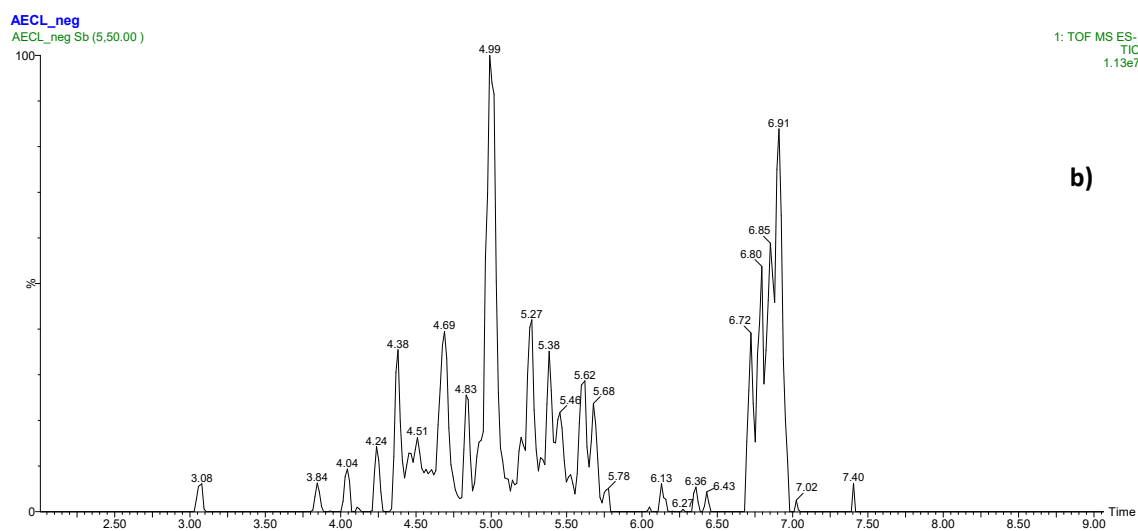

b)

**Figure S1.** UPLC-QTOF-MS chromatogram of AE fraction from *Croton linearis* Jacq leaves: **a)** positive ion mode, **b)** negative ion mode.

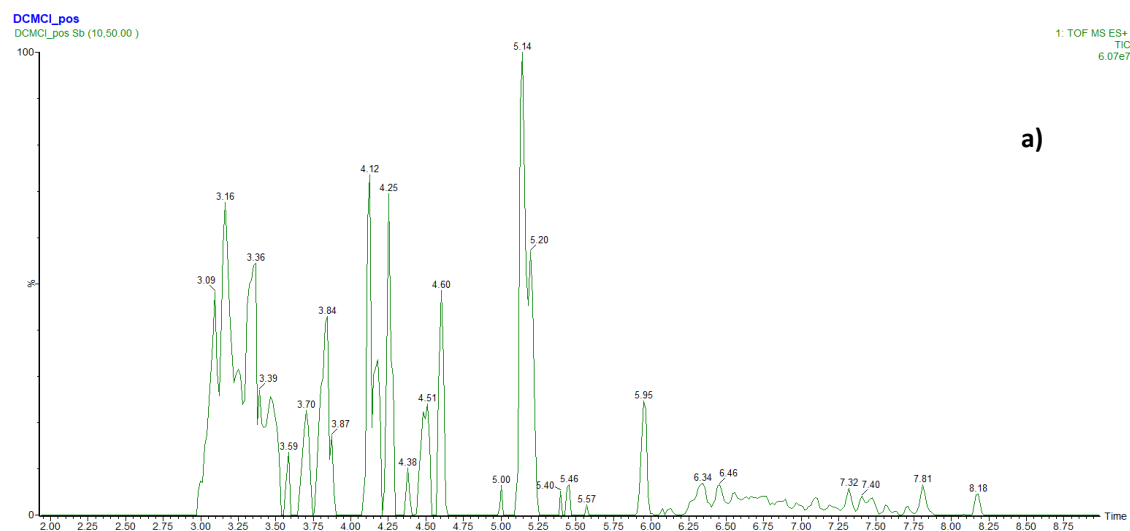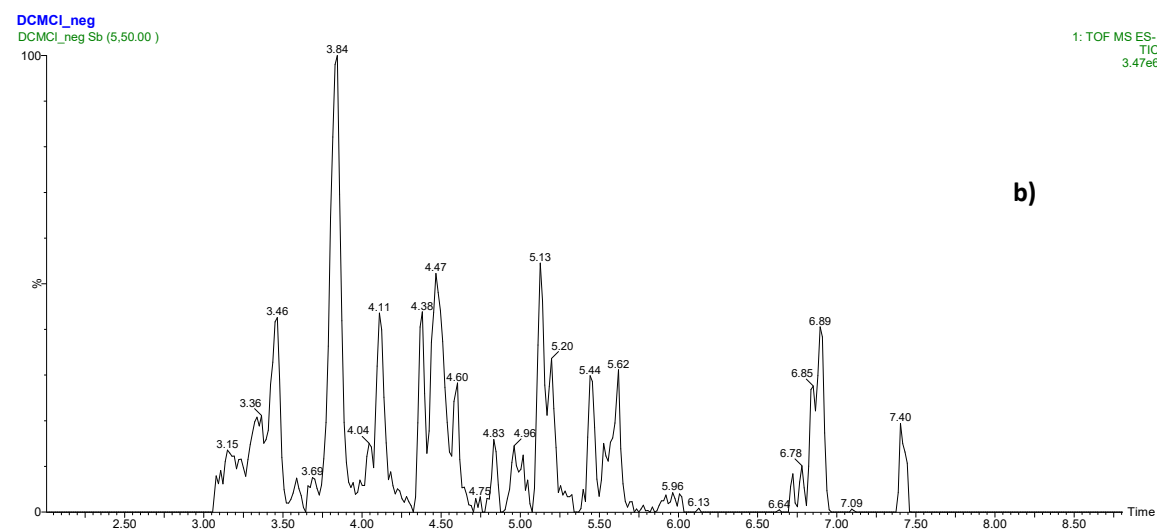

**Figure S2.** UPLC-QTOF-MS chromatogram of DCM fraction from *Croton linearis* Jacq leaves: **a)** positive ion mode, **b)** negative ion mode.
